# Supplementary material
Source: ML conference proceedings conference paper supplement (https://proceedings.neurips.cc/paper_files/paper/2018/hash/976abf49974d4686f87192efa0513ae0-Abstract.html)
Supplement: Supplementary file [file 976abf49974d4686f87192efa0513ae0-Supplemental.zip]

## CaptionBot: Turbo Supervised Learning

| CaptionBot: Turbo Supervised Learning                                                                        |                                                                                   |
|--------------------------------------------------------------------------------------------------------------|-----------------------------------------------------------------------------------|
| Input image:                                                                                                 |  |
| Human Generated Sentence:<br>a grilled cheese sandwich with a side of salad and a pickle                     |                                                                                   |
| Baseline LSTM-XE:<br>a sandwich and a salad on a white plate                                                 |                                                                                   |
| Baseline LSTM-RL:<br>a sandwich with a sandwich on a plate                                                   |                                                                                   |
| Turbo LSTM-XE:<br>a white plate topped with a sandwich and a salad                                           |                                                                                   |
| Turbo LSTM-RL:<br>a white plate topped with a sandwich and salad on top of a wooden table next to a glass of |                                                                                   |

| CaptionBot: Turbo Supervised Learning                                                                  |                                                                                     |
|--------------------------------------------------------------------------------------------------------|-------------------------------------------------------------------------------------|
| Input image:                                                                                           |  |
| Human Generated Sentence:<br>a group of people sitting around a dinner table who just finished eating. |                                                                                     |
| Baseline LSTM-XE:<br>a man sitting around a table                                                      |                                                                                     |
| Baseline LSTM-RL:<br>a group of people sitting around a table                                          |                                                                                     |
| Turbo LSTM-XE:<br>a group of people sitting around a table with glasses of wine                        |                                                                                     |
| Turbo LSTM-RL:<br>a group of people sitting around a table eating food at a table in a restaurant      |                                                                                     |

| CaptionBot: Turbo Supervised Learning                                                              |                                                                                     |
|----------------------------------------------------------------------------------------------------|-------------------------------------------------------------------------------------|
| Input image:                                                                                       |  |
| Human Generated Sentence:<br>a black and white cat is laying on a green pillow on top of a desk    |                                                                                     |
| Baseline LSTM-XE:<br>a black and white cat laying on a bed                                         |                                                                                     |
| Baseline LSTM-RL:<br>a cat laying on top of a bed                                                  |                                                                                     |
| Turbo LSTM-XE:<br>a black and white cat is sitting on a bed                                        |                                                                                     |
| Turbo LSTM-RL:<br>a black and white cat laying on top of a bed next to a laptop computer on a desk |                                                                                     |

## DrawingBot: Turbo Learning

### DrawingBot generated image

**Input Caption:** a living room with hard wood floors filled with furniture

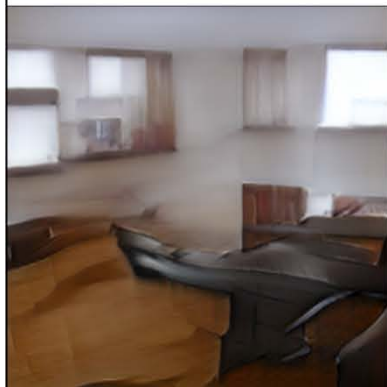

Baseline AttnGAN

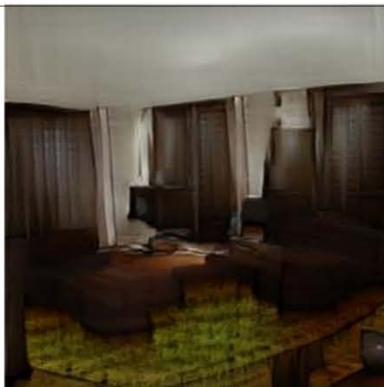

Turbo AttnGAN

### DrawingBot generated image

**Input Caption:** a photo of a homemade swirly pasta with broccoli carrots and onions

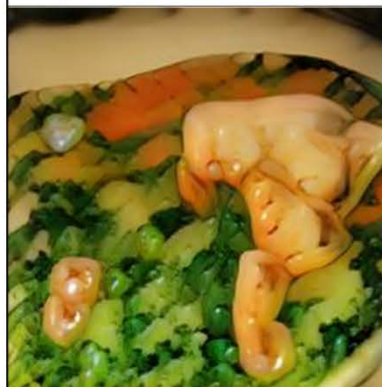

Baseline AttnGAN

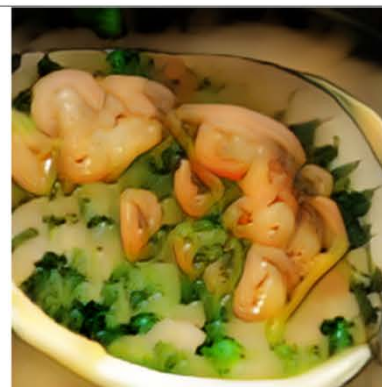

Turbo AttnGAN

### DrawingBot generated image

**Input Caption:** an old clock next to a light post in front of a steeple

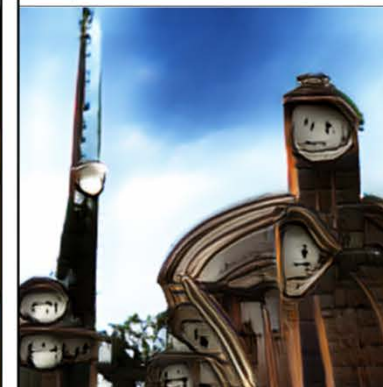

Baseline AttnGAN

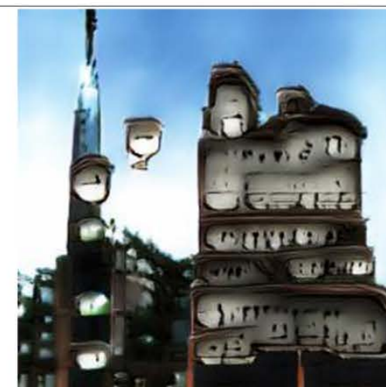

Turbo AttnGAN

## CaptionBot: Turbo Semi-Supervised Learning

| CaptionBot: Turbo Semi-Supervised Learning                                   |                                                                                   |
|------------------------------------------------------------------------------|-----------------------------------------------------------------------------------|
| Input image:                                                                 |  |
| <b>Human Generated Sentence:</b><br>a book sitting on top of a wooden desk   |                                                                                   |
| <b>Baseline LSTM-XE:</b><br>a wooden bench sitting on top of a sidewalk      |                                                                                   |
| <b>Baseline LSTM-RL:</b><br>a book on a wooden bench                         |                                                                                   |
| <b>Turbo Semi-Supervised LSTM-XE:</b><br>a book rest on one of the benches   |                                                                                   |
| <b>Turbo Semi-Supervised LSTM-RL:</b><br>a travel guide book on a park bench |                                                                                   |

| CaptionBot: Turbo Semi-Supervised Learning                                                   |                                                                                     |
|----------------------------------------------------------------------------------------------|-------------------------------------------------------------------------------------|
| Input image:                                                                                 |  |
| <b>Human Generated Sentence:</b><br>a bird perched on top of a wooden power pole             |                                                                                     |
| <b>Baseline LSTM-XE:</b><br>a bird that is standing on a pole                                |                                                                                     |
| <b>Baseline LSTM-RL:</b><br>a bird sitting on top of a wire fence                            |                                                                                     |
| <b>Turbo Semi-Supervised LSTM-XE:</b><br>a bird perched on top of a tree branch              |                                                                                     |
| <b>Turbo Semi-Supervised LSTM-RL:</b><br>a black bird perches at the top of a telephone pole |                                                                                     |

| CaptionBot: Turbo Semi-Supervised Learning                                                                             |                                                                                     |
|------------------------------------------------------------------------------------------------------------------------|-------------------------------------------------------------------------------------|
| Input image:                                                                                                           |  |
| <b>Human Generated Sentence:</b><br>a pizza topped with tomatoes and basil leafs and a glass of cola on a picnic table |                                                                                     |
| <b>Baseline LSTM-XE:</b><br>a pizza sitting on a plate on a table                                                      |                                                                                     |
| <b>Baseline LSTM-RL:</b><br>a pizza sitting on top of a white plate                                                    |                                                                                     |
| <b>Turbo Semi-Supervised LSTM-XE:</b><br>a pizza on a white plate on a wooden table and a drink                        |                                                                                     |
| <b>Turbo Semi-Supervised LSTM-RL:</b><br>a pizza on top of a white plate on a table next to a bottle of wine           |                                                                                     |
